# Supplementary material
Source: Springer Nature journal article supplement (https://www.springermedizin.de/resource/supplementary/12916_2007_154_MOESM5_ESM.pdf/9599280)
Supplement: MOESM5 [file 9599280]

**A**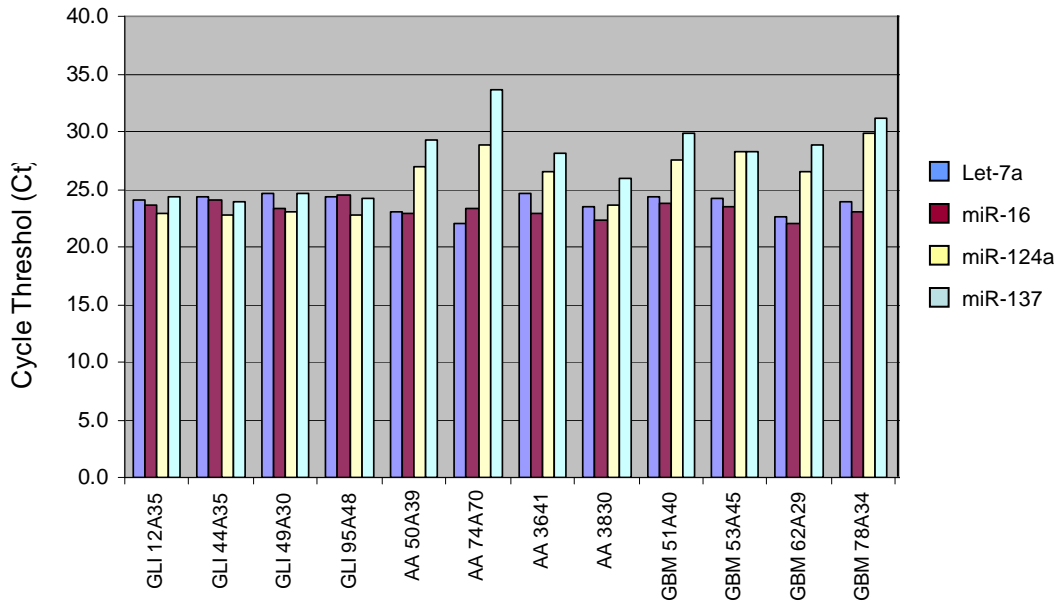**B**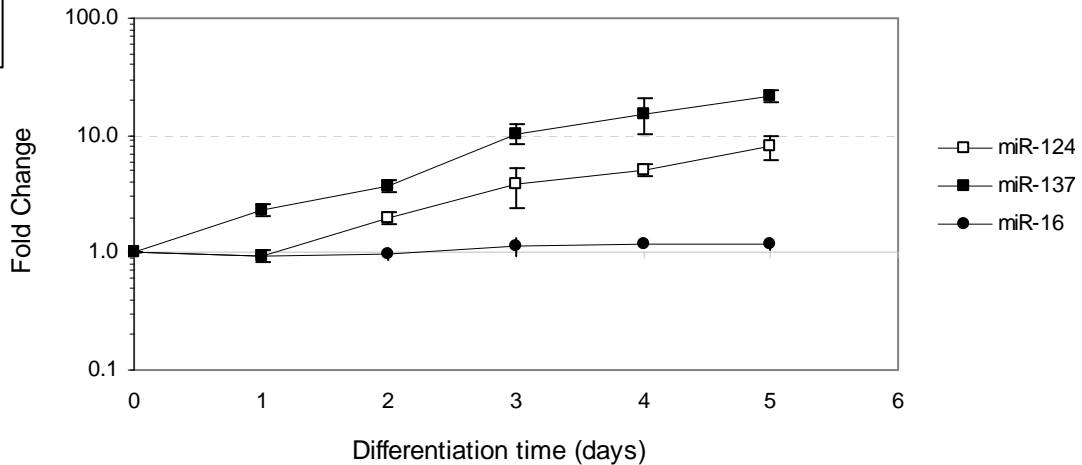

**Additional file 5 (Supplementary figure 2). Validation of Let-7a and miR-16 as appropriate control miRNAs in primary tumor samples and NSCs (A)** TaqMan cycle threshold (Ct) for miR-16, let-7a, miR-124, and miR-137 is plotted for primary tissue samples. Let-7a and miR-16 show little variation in Ct across samples relative to miR-124 and miR-137. Equal amounts of RNA (10ng; based on spectrophotometric measurements) were put into each RT reaction. (B) Expression of miR-16, relative to let-7a, does not change during differentiation of NSCs, whereas expression of miR-124a and miR-137, relative to let-7a, does.
